# Supplementary material for: Distinctive aerosol-cloud-precipitation interactions in marine boundary layer clouds from the ACE-ENA and SOCRATES aircraft field campaigns
Source: Copernicus journal article supplement (doi:10.5194/egusphere-2023-2608), 2023-11-14
Supplement: Supplementary file 1 [file egusphere-2023-2608-supplement.pdf]

*Supplement of*

**Distinctive aerosol-cloud-precipitation interactions in marine boundary layer clouds from the ACE-ENA and SOCRATES aircraft field campaigns**

Xiaojian Zheng et al.

**Correspondence:** Xiquan Dong (xdong@arizona.edu)

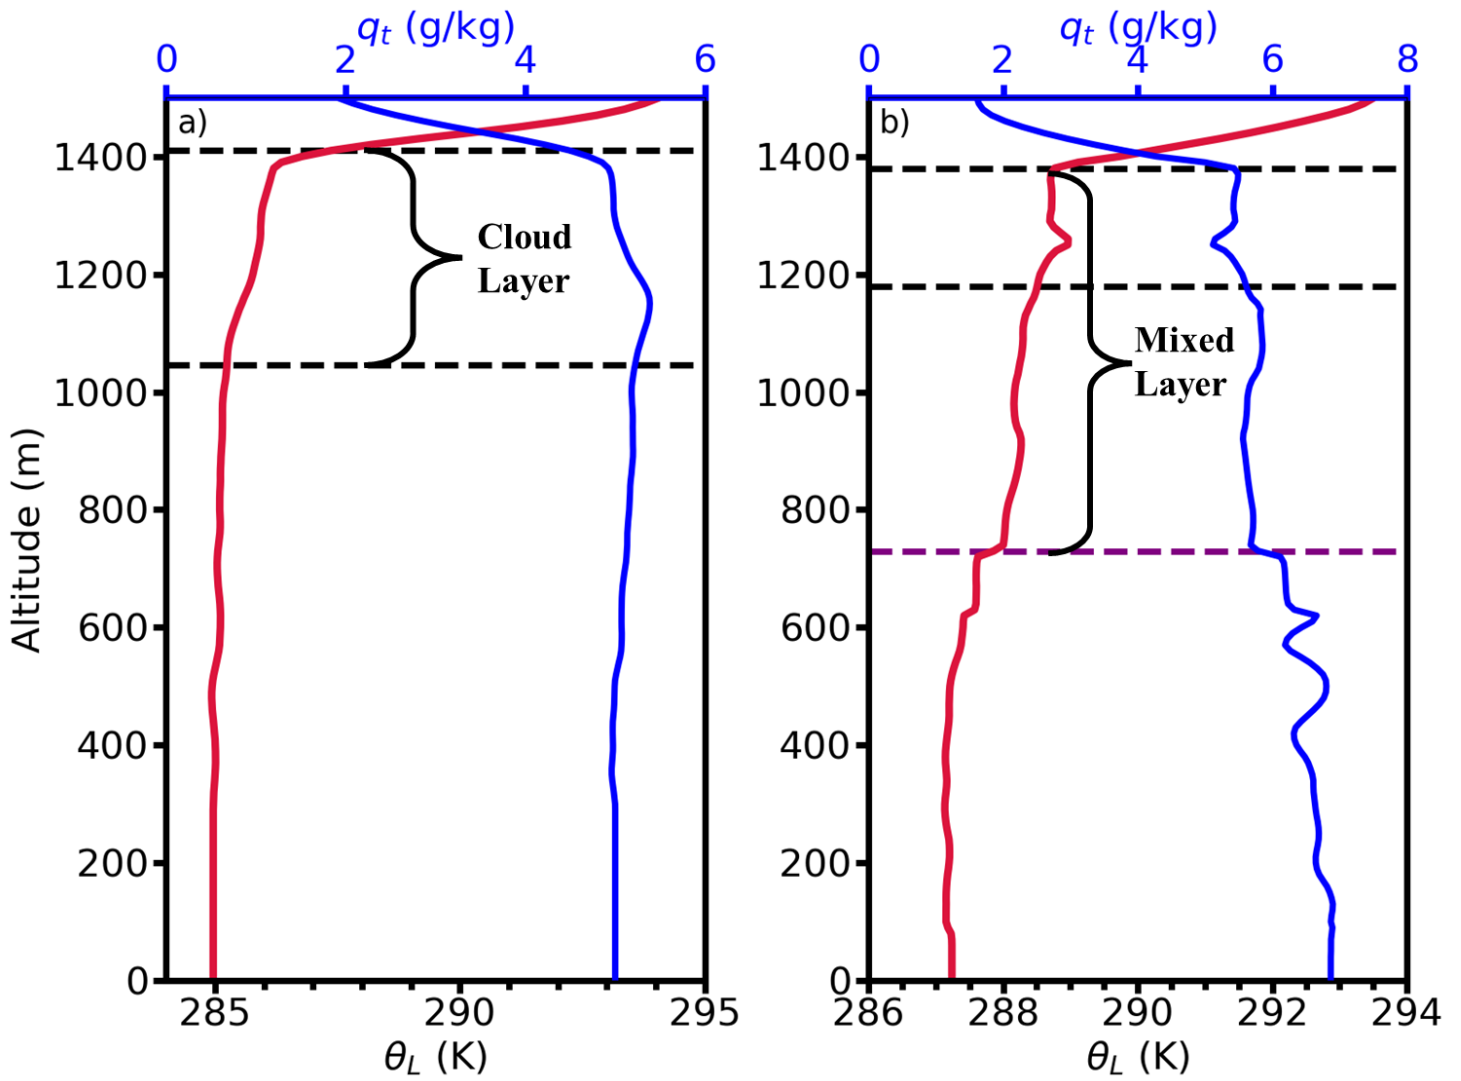

**Figure S1.** Illustration of mixed layer determination of a) coupled MBL case, and b) decoupled MBL case. Solid lines denote vertical variations of liquid water potential temperature ( $\theta_L$ , red) and total water mixing ratio ( $q_t$ , blue). Black dashed line denotes cloud boundaries and purple dashed line denotes mixed layer base altitude.

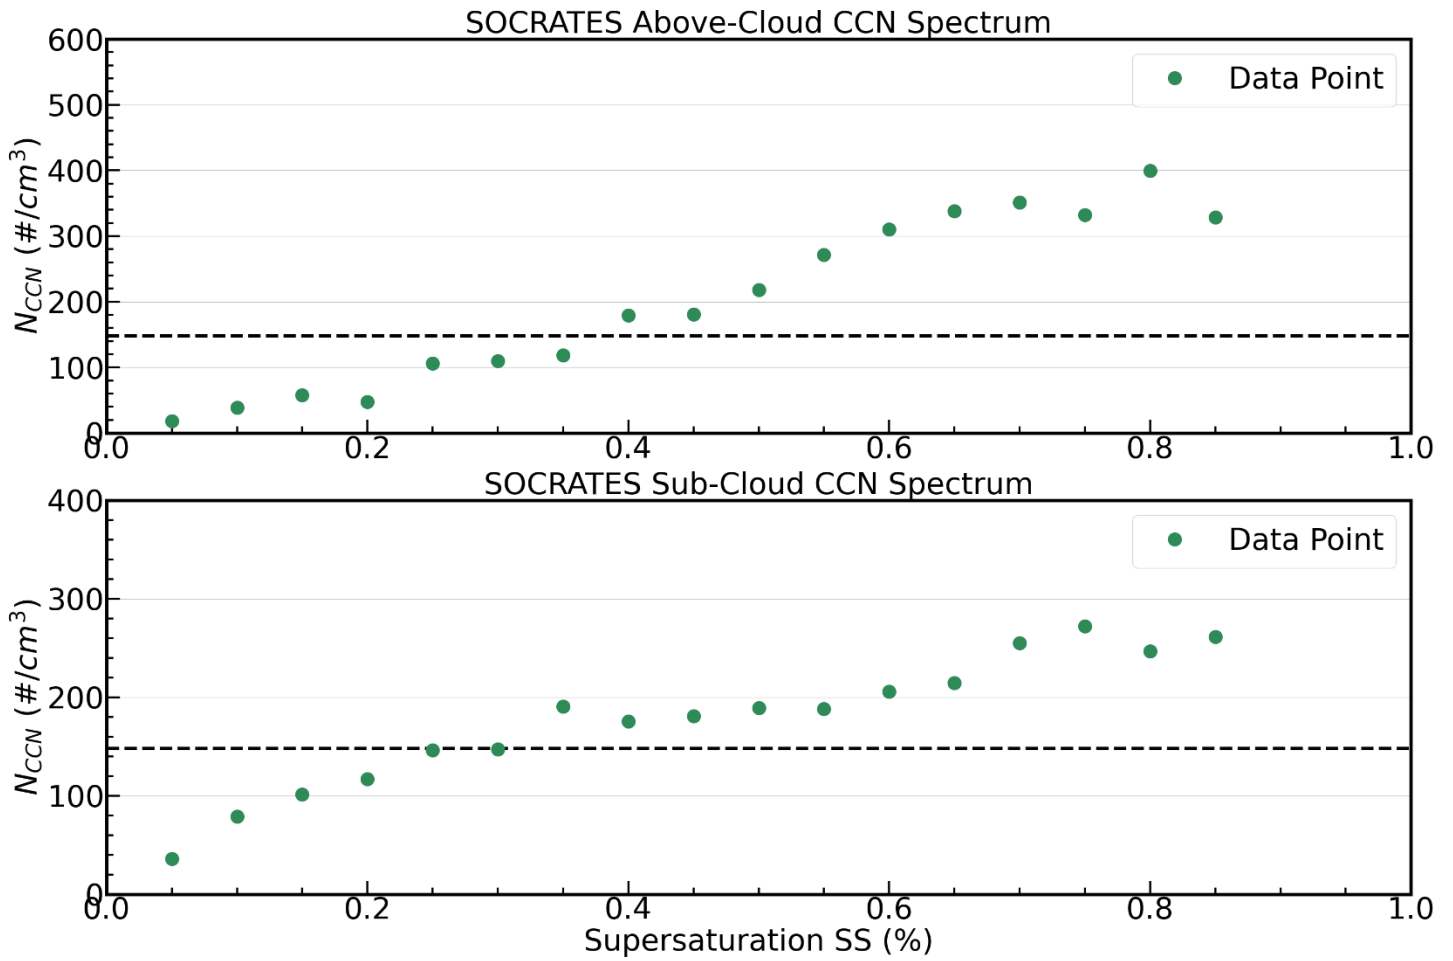

**Figure S2.** CCN spectra versus supersaturation during SOCRATES for a) above-cloud and b) sub-cloud regimes. Black dashed line denotes the averaged layer-mean  $N_c$ .

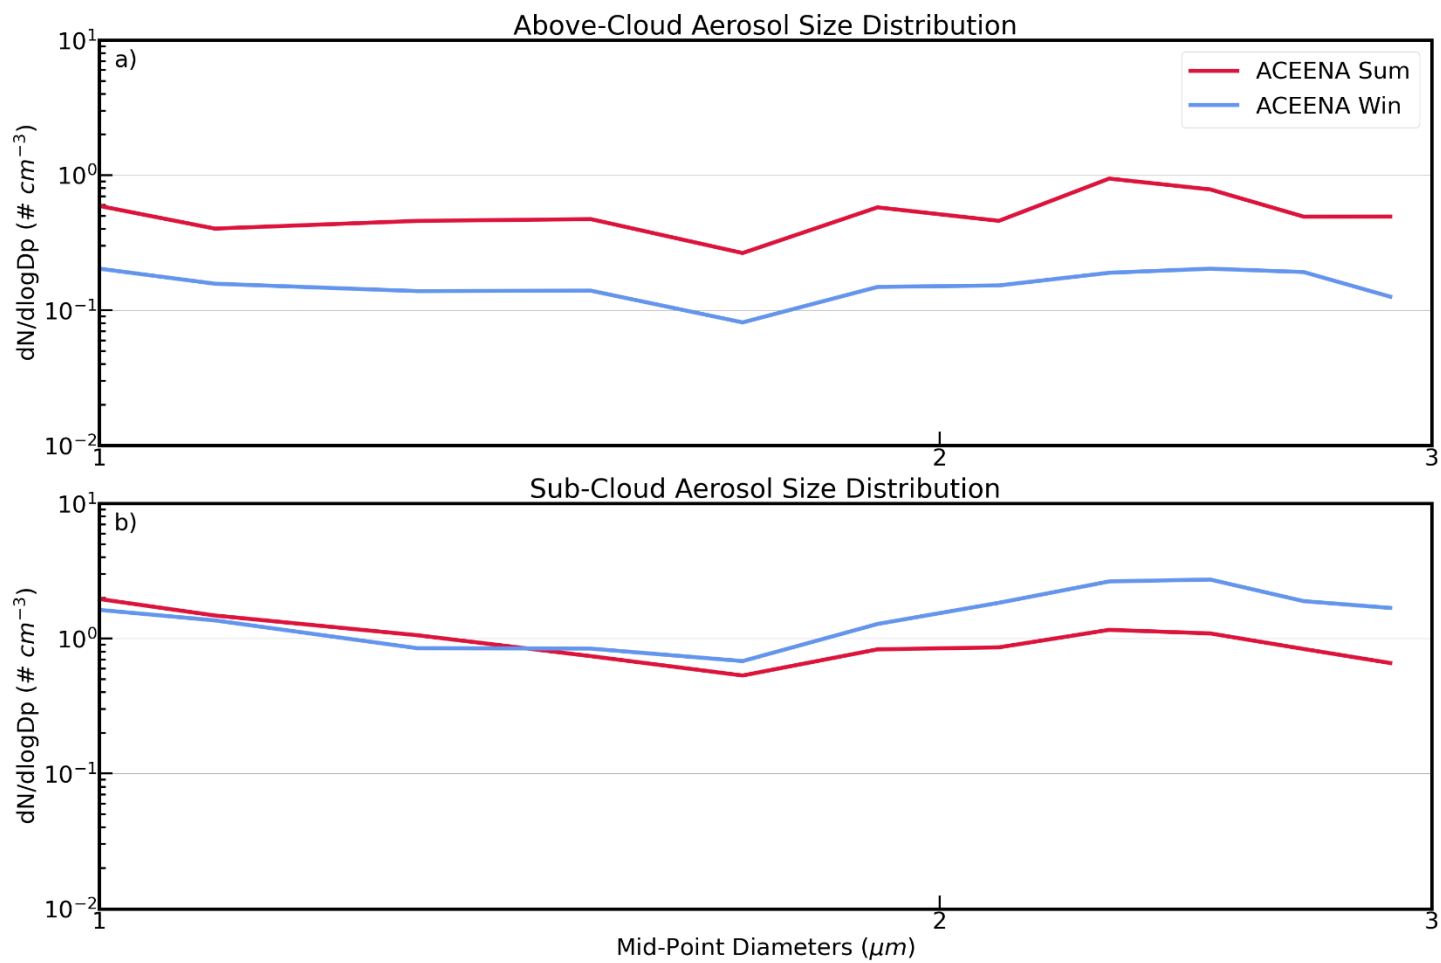

**Figure S3.** Coarse mode aerosol size distributions from PCASP ( $D_p = 1\text{-}3.2 \mu\text{m}$ ) for a) above-cloud and b) sub-cloud regimes, during ACE-ENA summer (red) and winter (blue).

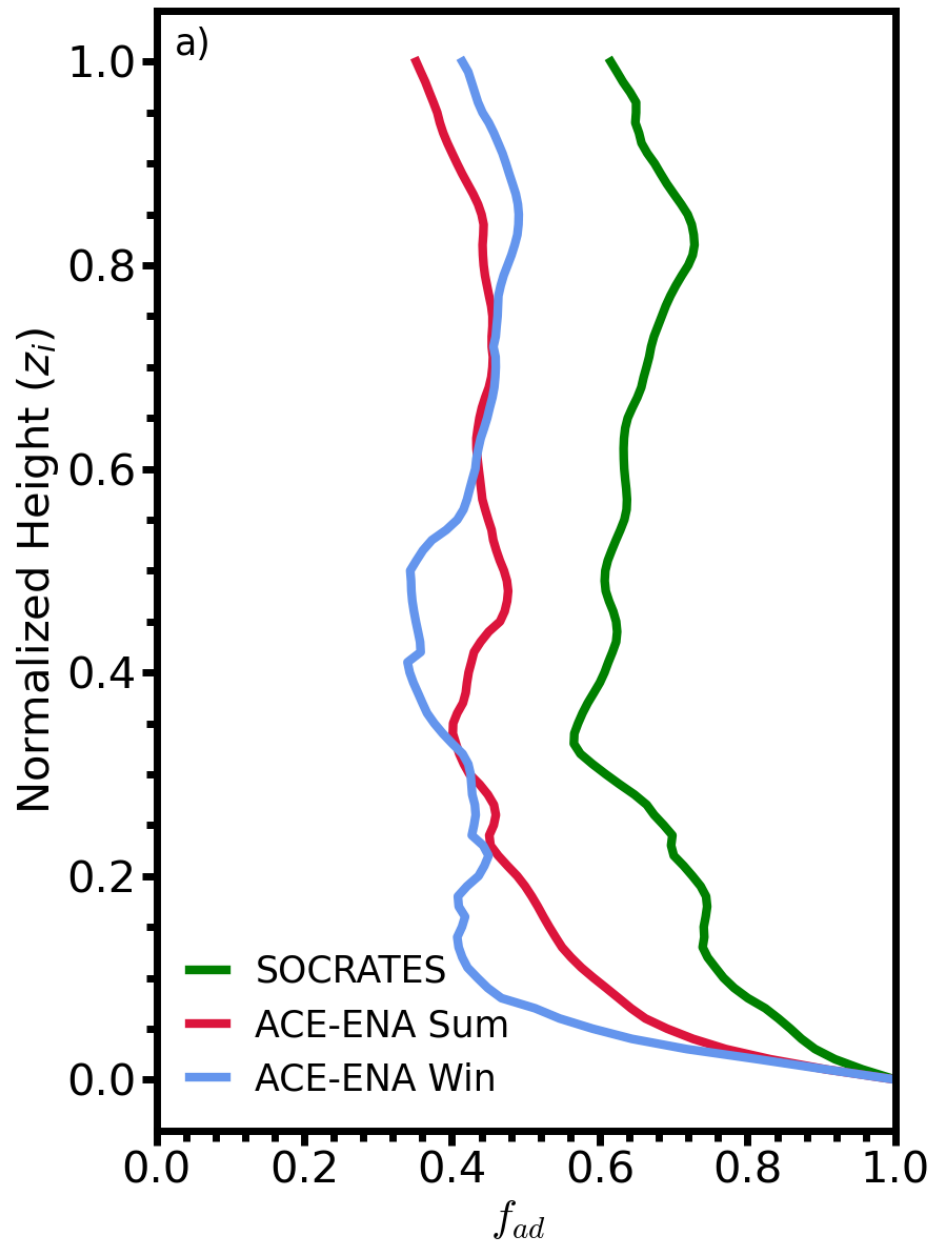

**Figure S4.** Vertical distributions of in-cloud sub-adiabaticity  $f_{ad}$ . ACE-ENA summer, winter and SOCRATES are color-coded with red, blue and green, respectively.

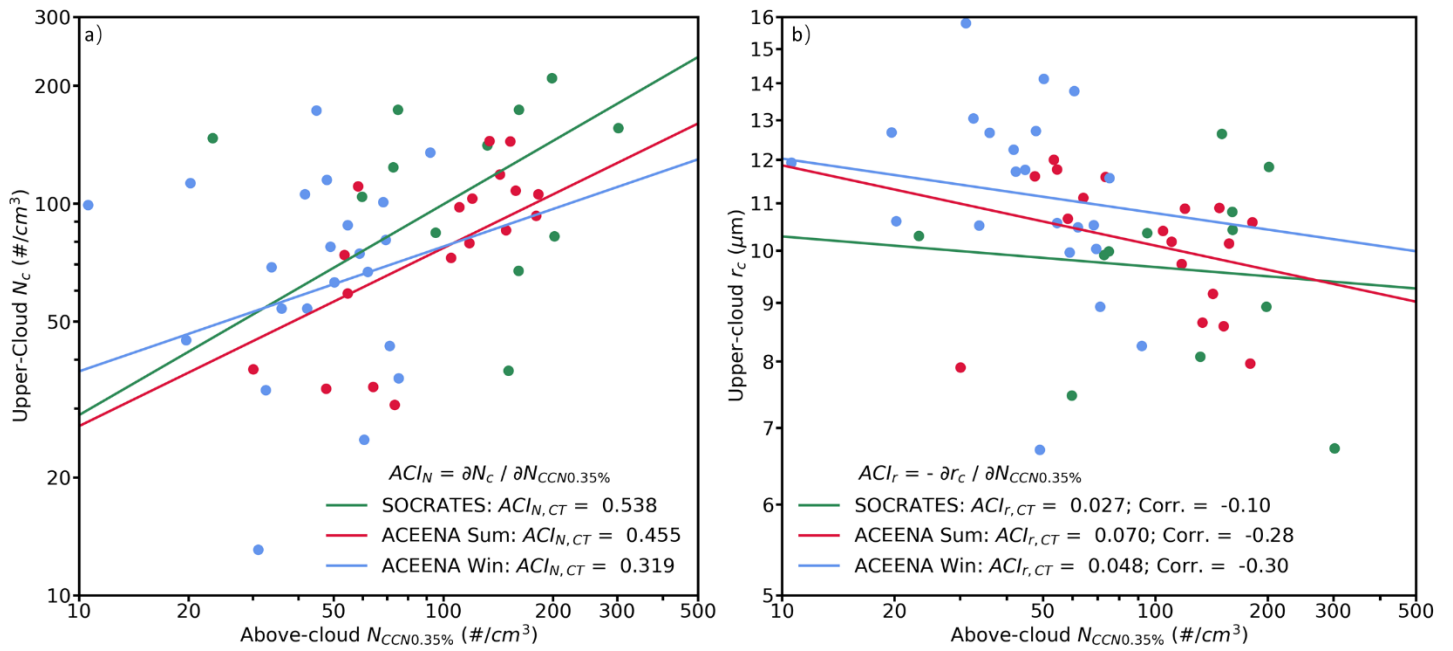

**Figure S5.** Scatterplots of a) upper-cloud  $N_c$  and b)  $r_c$  against the above-cloud  $N_{CCN0.35\%}$ . ACE-ENA summer, winter and SOCRATES are color-coded with red, blue and green, respectively.

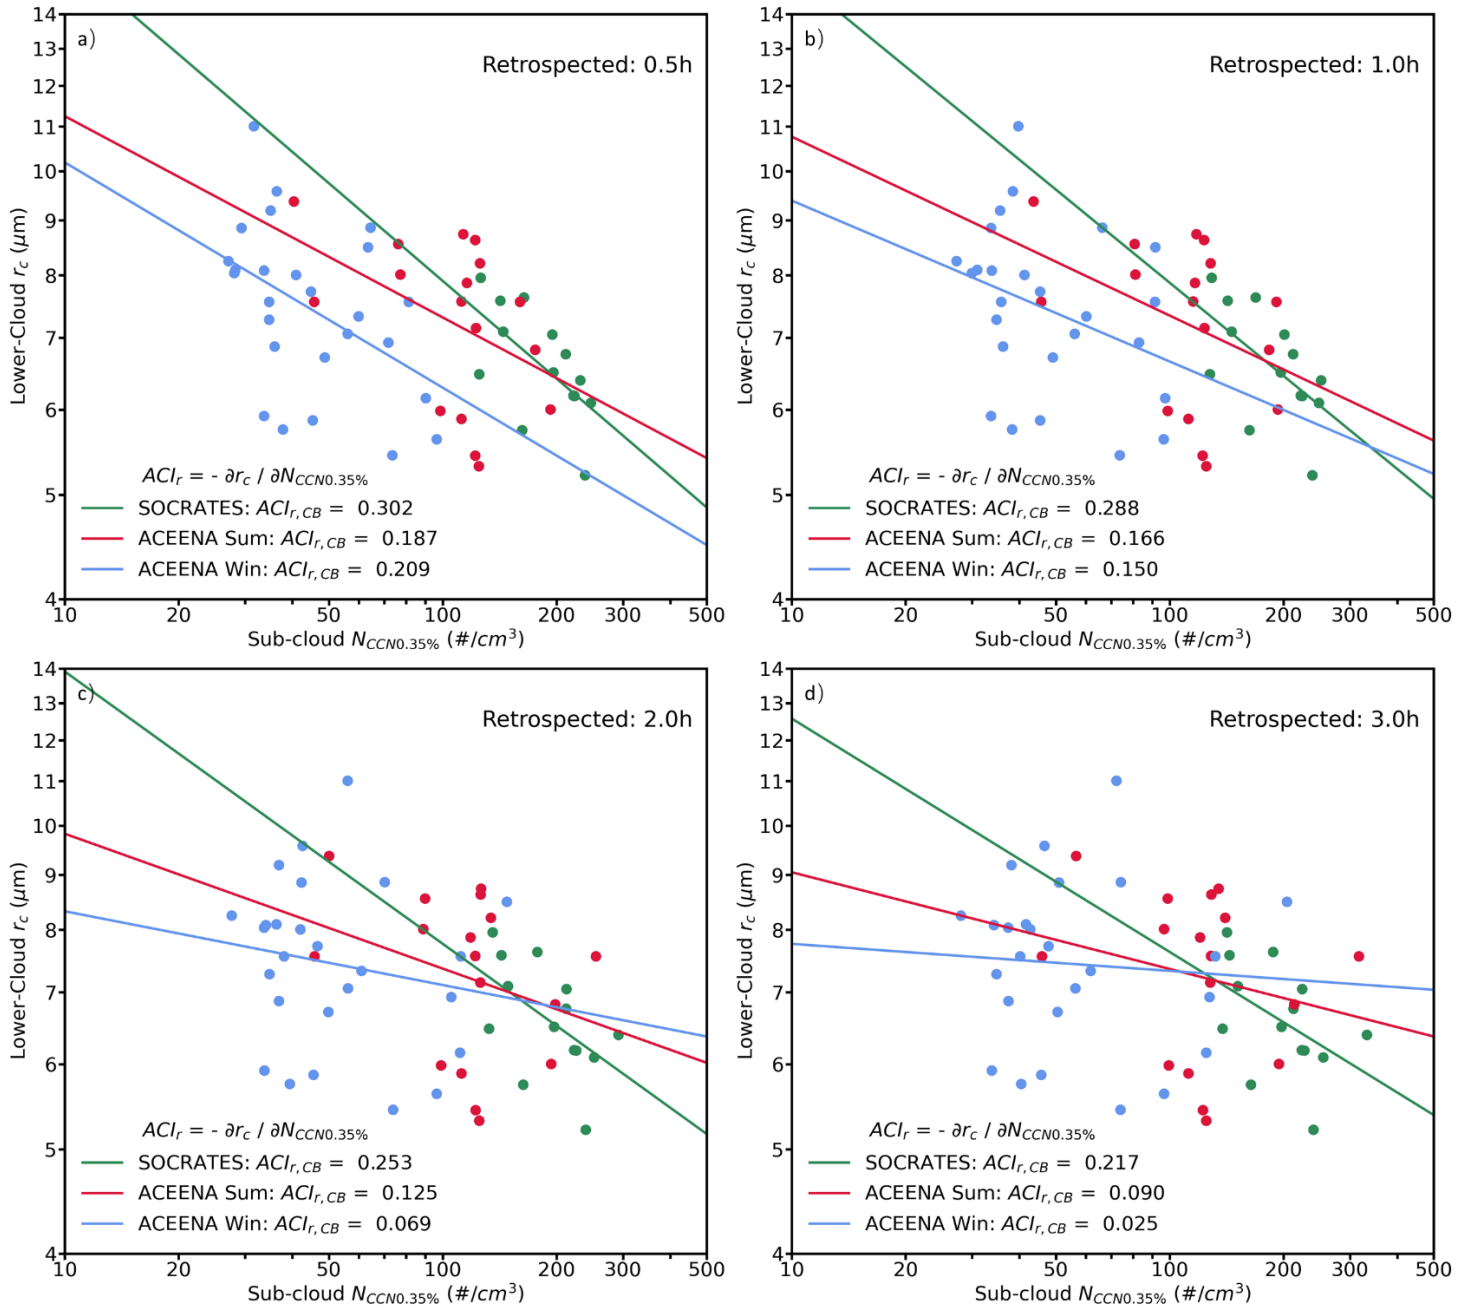

**Figure S6.** Scatterplots of lower-cloud  $r_c$  against the sub-cloud  $N_{CCN0.35\%}$ , at different  $N_{CCN0.35\%}$  retrospective time of a) 0.5 hours, b) 1 hours, c) 2 hours and d) 3 hours.

**Table S1.** List of selected cloud profiles and associated macrophysics

| ACE-ENA summer |           |         |          |       |       |       |           |
|----------------|-----------|---------|----------|-------|-------|-------|-----------|
| Date           | Start UTC | End UTC | Precip.* | $z_b$ | $z_t$ | $H_c$ | $H_{mix}$ |
| 20170628       | 9.65      | 10.8    | 0        | 659   | 797   | 138   | 797       |
| 20170630       | 9.9       | 11.3    | 1        | 909   | 1178  | 269   | 508       |
| 20170706       | 8.95      | 10.05   | 1        | 1151  | 1607  | 456   | 657       |
| 20170706       | 10.05     | 10.3    | 1        | 1344  | 1534  | 190   | 424       |
| 20170706       | 10.4      | 11.4    | 1        | 1320  | 1600  | 280   | 590       |
| 20170712       | 9.5       | 10.8    | 1        | 912   | 1273  | 361   | 593       |
| 20170712       | 10.8      | 11      | 1        | 373   | 597   | 224   | 307       |
| 20170712       | 11.1      | 12.3    | 1        | 750   | 1174  | 424   | 534       |
| 20170713       | 9         | 10.3    | 0        | 1140  | 1278  | 138   | 778       |
| 20170713       | 10.3      | 11.8    | 0        | 1169  | 1345  | 176   | 615       |
| 20170713       | 11.8      | 12.55   | 0        | 1139  | 1311  | 172   | 591       |
| 20170715       | 10.9      | 12.2    | 0        | 918   | 1080  | 162   | 610       |
| 20170715       | 12.45     | 13.6    | 1        | 1002  | 1423  | 421   | 613       |
| 20170718       | 8.9       | 9.1     | 1        | 627   | 964   | 337   | 964       |
| 20170718       | 9.1       | 10.9    | 1        | 588   | 1080  | 492   | 1080      |
| 20170718       | 10.9      | 11.9    | 1        | 646   | 970   | 324   | 970       |
| 20170720       | 9         | 10.8    | 1        | 233   | 1124  | 891   | 1124      |
| 20170720       | 10.8      | 11.1    | 1        | 546   | 1145  | 599   | 855       |
| ACE-ENA winter |           |         |          |       |       |       |           |
| Date           | Start UTC | End UTC | Precip.* | $z_b$ | $z_t$ | $H_c$ | $H_{mix}$ |
| 20180119       | 12.8      | 14.1    | 1        | 405   | 1009  | 604   | 1009      |
| 20180119       | 14.3      | 15.5    | 1        | 441   | 984   | 543   | 984       |
| 20180119       | 15.5      | 15.7    | 1        | 666   | 967   | 301   | 497       |
| 20180121       | 10.3      | 11.4    | 1        | 1113  | 1399  | 286   | 799       |
| 20180121       | 11.45     | 11.7    | 0        | 1152  | 1225  | 73    | 805       |
| 20180125       | 11.5      | 12.7    | 1        | 1191  | 1613  | 422   | 483       |
| 20180125       | 12.7      | 13      | 1        | 1235  | 1663  | 428   | 1663      |
| 20180125       | 13        | 14.1    | 1        | 1102  | 1655  | 553   | 755       |
| 20180126       | 11.1      | 11.2    | 0        | 1046  | 1410  | 364   | 1410      |
| 20180126       | 11.3      | 11.55   | 0        | 1104  | 1410  | 306   | 1410      |
| 20180126       | 11.55     | 13      | 0        | 1102  | 1494  | 392   | 1494      |
| 20180129       | 10.1      | 11.3    | 1        | 1180  | 1379  | 199   | 649       |
| 20180129       | 11.6      | 13      | 1        | 1077  | 1429  | 352   | 679       |
| 20180130       | 10.1      | 11.8    | 0        | 941   | 1396  | 455   | 1396      |
| 20180130       | 11.8      | 12.2    | 0        | 1034  | 1212  | 178   | 242       |
| 20180130       | 12.2      | 13.4    | 0        | 1056  | 1376  | 320   | 346       |
| 20180130       | 13.4      | 13.6    | 0        | 1214  | 1331  | 117   | 1201      |
| 20180207       | 17.9      | 18.8    | 0        | 1158  | 1512  | 354   | 1512      |
| 20180208       | 13.5      | 14.6    | 1        | 1680  | 2049  | 369   | 589       |
| 20180208       | 14.6      | 14.9    | 0        | 1925  | 2061  | 136   | 211       |
| 20180209       | 13.2      | 14.6    | 1        | 453   | 802   | 349   | 582       |
| 20180210       | 15        | 16.3    | 0        | 1371  | 1546  | 175   | 726       |



|                 |                  |                |                 |                         |                         |                         |                             |
|-----------------|------------------|----------------|-----------------|-------------------------|-------------------------|-------------------------|-----------------------------|
| 20180211        | 11.95            | 13.55          | 1               | 548                     | 1728                    | 1180                    | 1728                        |
| 20180211        | 13.55            | 13.8           | 1               | 712                     | 1888                    | 1176                    | 1888                        |
| 20180212        | 11.7             | 13             | 0               | 1043                    | 1287                    | 244                     | 1287                        |
| 20180212        | 13.25            | 14.4           | 0               | 906                     | 1233                    | 327                     | 1233                        |
| <b>SOCRATES</b> |                  |                |                 |                         |                         |                         |                             |
| <b>Date</b>     | <b>Start UTC</b> | <b>End UTC</b> | <b>Precip.*</b> | <b><math>z_b</math></b> | <b><math>z_t</math></b> | <b><math>H_c</math></b> | <b><math>H_{mix}</math></b> |
| 20180115        | 26.0833          | 26.25          | 0               | 2021                    | 2259                    | 238                     | 909                         |
| 20180128        | 26               | 26.17          | 1               | 741                     | 1336                    | 595                     | 1336                        |
| 20180131        | 4.667            | 4.783          | 1               | 1112                    | 1599                    | 487                     | 999                         |
| 20180203        | 27               | 27.25          | 1               | 702                     | 1444                    | 742                     | 1444                        |
| 20180203        | 27.333           | 27.5           | 0               | 1260                    | 1741                    | 481                     | 1091                        |
| 20180203        | 27.51            | 27.625         | 0               | 1065                    | 1830                    | 765                     | 1110                        |
| 20180204        | 26.933           | 27.367         | 1               | 1047                    | 2221                    | 1174                    | 2221                        |
| 20180204        | 27.417           | 27.667         | 1               | 1295                    | 2256                    | 961                     | 1446                        |
| 20180204        | 27.683           | 27.867         | 1               | 1759                    | 2355                    | 596                     | 1295                        |
| 20180207        | 24.833           | 25.033         | 0               | 2167                    | 2397                    | 230                     | 677                         |
| 20180217        | 27.417           | 27.7           | 1               | 903                     | 1087                    | 184                     | 1087                        |
| 20180217        | 27.733           | 27.983         | 1               | 907                     | 1303                    | 396                     | 1053                        |
| 20180217        | 28               | 28.075         | 1               | 820                     | 1298                    | 478                     | 1008                        |
| 20180217        | 28.075           | 28.167         | 1               | 956                     | 1312                    | 356                     | 912                         |
| 20180217        | 28.333           | 28.833         | 1               | 1028                    | 1349                    | 321                     | 1349                        |
| 20180217        | 29.117           | 29.2           | 1               | 752                     | 1324                    | 572                     | 944                         |
| 20180217        | 29.2             | 29.267         | 1               | 706                     | 1324                    | 618                     | 1324                        |
| 20180219        | 26.833           | 26.917         | 1               | 577                     | 844                     | 267                     | 844                         |
| 20180219        | 26.917           | 26.992         | 1               | 476                     | 913                     | 437                     | 913                         |
| 20180219        | 26.992           | 27.083         | 1               | 468                     | 911                     | 443                     | 911                         |
| 20180219        | 27.3             | 27.583         | 1               | 696                     | 1045                    | 349                     | 1045                        |
| 20180219        | 27.75            | 27.883         | 1               | 684                     | 1228                    | 544                     | 918                         |
| 20180219        | 27.883           | 27.958         | 1               | 646                     | 1259                    | 613                     | 1259                        |
| 20180219        | 27.958           | 28.083         | 1               | 805                     | 1166                    | 361                     | 936                         |
| 20180219        | 28.6             | 28.725         | 1               | 821                     | 1119                    | 298                     | 589                         |
| 20180219        | 28.725           | 28.817         | 1               | 622                     | 1155                    | 533                     | 1155                        |
| 20180219        | 28.817           | 28.917         | 1               | 855                     | 1101                    | 246                     | 771                         |
| 20180219        | 29.083           | 29.333         | 1               | 783                     | 1145                    | 362                     | 1145                        |

\*Precipitation status of 1 means noticeable drizzle droplets ( $N_d > 0.001 \text{ cm}^{-3}$ ) exists below the cloud base, while 0 means the opposite.

**Table S2.** List of selected cloud profiles and associated microphysics

| ACE-ENA summer |           |         |       |       |         |        |           |         |              |              |          |           |
|----------------|-----------|---------|-------|-------|---------|--------|-----------|---------|--------------|--------------|----------|-----------|
| Date           | Start UTC | End UTC | $N_c$ | $r_c$ | $LWC_c$ | $N_d$  | $D_{mmd}$ | $LWC_d$ | $N_{CCN,sc}$ | $N_{CCN,ac}$ | $R_{CB}$ | $L_{CCN}$ |
| 20170628       | 9.65      | 10.8    | 66.2  | 6.3   | 0.065   | 0.0058 | 53.6      | 0.0006  | 112.0        | 104.9        | 0.0021   | -0.05     |
| 20170630       | 9.9       | 11.3    | 115.7 | 6.7   | 0.130   | 0.0253 | 54.4      | 0.0037  | 192.3        | 157.7        | 0.0055   | -0.75     |
| 20170706       | 8.95      | 10.05   | 104.9 | 9.1   | 0.347   | 0.4139 | 51.2      | 0.0179  | 108.7        | 120.0        | 0.0406   | -6.65     |
| 20170706       | 10.05     | 10.3    | 71.6  | 8.1   | 0.181   | 0.0362 | 63.3      | 0.0030  | 98.3         | 117.7        | 0.0055   | -0.39     |
| 20170706       | 10.4      | 11.4    | 89.3  | 9.0   | 0.264   | 0.3279 | 50.9      | 0.0143  | 122.4        | 110.6        | 0.0616   | -5.87     |
| 20170712       | 9.5       | 10.8    | 125.6 | 8.0   | 0.245   | 0.0122 | 65.8      | 0.0030  | 73.4         | 152.6        | 0.0448   | -7.71     |
| 20170712       | 10.8      | 11      | 81.8  | 9.9   | 0.304   | 0.1075 | 71.9      | 0.0281  | 120.4        | 148.4        | 0.0208   | -2.80     |
| 20170712       | 11.1      | 12.3    | 86.2  | 8.7   | 0.200   | 0.0528 | 60.8      | 0.0093  | 109.1        | 142.8        | 0.0556   | -8.56     |
| 20170713       | 9         | 10.3    | 143.5 | 8.1   | 0.322   | 0.0075 | 79.5      | 0.0036  | 121.4        | 133.8        | 0.0384   | -2.20     |
| 20170713       | 10.3      | 11.8    | 123.3 | 5.8   | 0.093   | 0.0006 | 55.3      | 0.0001  | 124.7        | 179.8        | 0.0012   | -0.09     |
| 20170713       | 11.8      | 12.55   | 105.2 | 6.0   | 0.086   | 0.0010 | 56.1      | 0.0002  | 121.9        | 182.0        | 0.0025   | -0.18     |
| 20170715       | 10.9      | 12.2    | 34.2  | 8.5   | 0.087   | 0.0313 | 57.7      | 0.0037  | 45.6         | 30.1         | 0.0046   | -0.09     |
| 20170715       | 12.45     | 13.6    | 33.2  | 12.1  | 0.205   | 0.5284 | 76.1      | 0.1485  | 37.2         | 73.5         | 0.1255   | -6.44     |
| 20170718       | 8.9       | 9.1     | 99.0  | 9.3   | 0.354   | 0.0514 | 79.6      | 0.0175  | 114.9        | 58.3         | 0.0234   | -1.82     |
| 20170718       | 9.1       | 10.9    | 81.3  | 11.4  | 0.509   | 0.2273 | 90.7      | 0.0991  | 71.7         | 53.4         | 0.1086   | -9.05     |
| 20170718       | 10.9      | 11.9    | 62.7  | 11.1  | 0.369   | 0.2358 | 89.2      | 0.0881  | 73.2         | 54.6         | 0.1698   | -8.00     |
| 20170720       | 9         | 10.8    | 45.9  | 10.8  | 0.180   | 0.5023 | 84.4      | 0.0975  | 168.0        | 64.2         | 0.1854   | -15.19    |
| 20170720       | 10.8      | 11.1    | 55.5  | 9.9   | 0.187   | 0.3672 | 101.1     | 0.1280  | 128.9        | 47.6         | 0.7165   | -62.67    |
| ACE-ENA winter |           |         |       |       |         |        |           |         |              |              |          |           |
| Date           | Start UTC | End UTC | $N_c$ | $r_c$ | $LWC_c$ | $N_d$  | $D_{mmd}$ | $LWC_d$ | $N_{CCN,sc}$ | $N_{CCN,ac}$ | $R_{CB}$ | $L_{CCN}$ |
| 20180119       | 12.8      | 14.1    | 20.1  | 12.0  | 0.126   | 0.3981 | 108.6     | 0.1495  | 23.5         | 31.0         | 0.6008   | -16.24    |
| 20180119       | 14.3      | 15.5    | 43.8  | 11.7  | 0.263   | 0.2391 | 78.8      | 0.0645  | 25.0         | 19.7         | 0.1591   | -8.65     |
| 20180119       | 15.5      | 15.7    | 29.8  | 11.6  | 0.185   | 0.4405 | 69.9      | 0.0839  | 34.4         | 32.6         | 0.0304   | -1.24     |
| 20180121       | 10.3      | 11.4    | 49.2  | 9.3   | 0.151   | 0.1644 | 61.5      | 0.0206  | 26.2         | 33.7         | 0.0938   | -3.72     |
| 20180121       | 11.45     | 11.7    | 44.8  | 8.2   | 0.095   | 0.0057 | 59.0      | 0.0005  | 34.7         | 71.1         | 0.0031   | -0.03     |
| 20180125       | 11.5      | 12.7    | 63.8  | 10.7  | 0.342   | 0.1775 | 76.5      | 0.0573  | 35.2         | 50.2         | 0.4493   | -56.37    |
| 20180125       | 12.7      | 13      | 140.9 | 10.6  | 0.739   | 0.0770 | 98.1      | 0.0482  | 62.4         | 44.8         | 0.0481   | -3.93     |
| 20180125       | 13        | 14.1    | 75.9  | 10.7  | 0.412   | 0.1450 | 93.7      | 0.0626  | 60.6         | 41.7         | 0.1781   | -22.29    |
| 20180126       | 11.1      | 11.2    | 110.5 | 10.5  | 0.626   | 0.0698 | 94.4      | 0.0312  | 40.6         | 47.9         | 0.0110   | -0.71     |
| 20180126       | 11.3      | 11.55   | 160.1 | 9.1   | 0.579   | 0.0135 | 80.9      | 0.0062  | 59.4         | 0.7          | 0.0097   | -0.76     |
| 20180126       | 11.55     | 13      | 111.5 | 9.2   | 0.408   | 0.0206 | 68.8      | 0.0069  | 48.4         | 10.6         | 0.0102   | -0.67     |
| 20180129       | 10.1      | 11.3    | 54.8  | 10.2  | 0.247   | 0.0739 | 60.3      | 0.0113  | 34.4         | 36.0         | 0.1082   | -4.09     |
| 20180129       | 11.6      | 13      | 56.1  | 9.0   | 0.179   | 0.0200 | 61.7      | 0.0047  | 33.5         | 42.3         | 0.0038   | -0.25     |
| 20180130       | 10.1      | 11.8    | 82.9  | 9.2   | 0.276   | 0.0993 | 72.7      | 0.0184  | 45.2         | 58.9         | 0.0025   | -0.15     |
| 20180130       | 11.8      | 12.2    | 102.5 | 9.6   | 0.396   | 0.0057 | 93.0      | 0.0039  | 35.6         | 68.4         | 0.0037   | -0.62     |
| 20180130       | 12.2      | 13.4    | 71.9  | 7.7   | 0.146   | 0.0261 | 61.3      | 0.0042  | 33.6         | 69.5         | 0.0146   | -2.19     |
| 20180130       | 13.4      | 13.6    | 58.2  | 8.8   | 0.141   | 0.0097 | 65.6      | 0.0031  | 33.6         | 75.3         | 0.0038   | -0.05     |
| 20180207       | 17.9      | 18.8    | 120.2 | 8.6   | 0.359   | 0.0084 | 72.7      | 0.0033  | 37.2         | 20.2         | 0.0173   | -1.10     |
| 20180208       | 13.5      | 14.6    | 32.3  | 10.3  | 0.128   | 0.2630 | 74.1      | 0.0695  | 25.6         | 60.6         | 0.1173   | -5.34     |
| 20180208       | 14.6      | 14.9    | 59.3  | 9.8   | 0.231   | 0.0086 | 68.1      | 0.0023  | 26.9         | 62.0         | 0.0043   | -0.37     |
| 20180209       | 13.2      | 14.6    | 51.6  | 11.2  | 0.337   | 0.1209 | 92.7      | 0.0509  | 44.2         | 7.6          | 0.0169   | -1.17     |

| 20180210        | 15        | 16.3    | 69.3  | 7.7   | 0.159   | 0.0124 | 55.4      | 0.0024  | 55.9         | 54.6         | 0.0030   | -0.11     |
|-----------------|-----------|---------|-------|-------|---------|--------|-----------|---------|--------------|--------------|----------|-----------|
| 20180211        | 11.95     | 13.55   | 54.0  | 10.3  | 0.170   | 0.3182 | 100.9     | 0.1142  | 71.1         | 6.3          | 0.2443   | -20.28    |
| 20180211        | 13.55     | 13.8    | 50.5  | 9.2   | 0.100   | 0.2453 | 93.2      | 0.0313  | 83.2         | 1.8          | 0.1964   | -13.91    |
| 20180212        | 11.7      | 13      | 126.6 | 7.9   | 0.282   | 0.0058 | 64.6      | 0.0012  | 73.4         | 92.0         | 0.0043   | -0.23     |
| 20180212        | 13.25     | 14.4    | 75.9  | 6.8   | 0.108   | 0.0035 | 56.3      | 0.0007  | 96.3         | 49.0         | 0.0018   | -0.08     |
| <b>SOCRATES</b> |           |         |       |       |         |        |           |         |              |              |          |           |
| Date            | Start UTC | End UTC | $N_c$ | $r_c$ | $LWC_c$ | $N_d$  | $D_{mmd}$ | $LWC_d$ | $N_{CCN,sc}$ | $N_{CCN,ac}$ | $R_{CB}$ | $L_{CCN}$ |
| 20180115        | 26.0833   | 26.25   | 63.4  | 9.2   | 0.195   | 0.4686 | 51.5      | 0.0324  | nan          | 160.9        | 0.0157   | -0.59     |
| 20180128        | 26        | 26.17   | 107.4 | 9.1   | 0.269   | 0.3262 | 57.2      | 0.0284  | 122.9        | nan          | 0.0581   | -6.25     |
| 20180131        | 4.667     | 4.783   | 51.2  | 10.5  | 0.217   | 0.9472 | 55.1      | 0.0641  | nan          | nan          | 0.0422   | -2.37     |
| 20180203        | 27        | 27.25   | 89.0  | 9.5   | 0.257   | 0.4372 | 51.8      | 0.0294  | nan          | 95.1         | 0.0147   | -1.51     |
| 20180203        | 27.333    | 27.5    | 189.1 | 6.8   | 0.222   | 0.0009 | 47.5      | 0.0001  | nan          | nan          | 0.0072   | -1.35     |
| 20180203        | 27.51     | 27.625  | 267.8 | 6.6   | 0.258   | 0.0011 | 50.0      | 0.0001  | nan          | nan          | 0.0022   | -0.92     |
| 20180204        | 26.933    | 27.367  | 101.9 | 7.3   | 0.157   | 0.0685 | 55.3      | 0.0048  | 237.7        | 59.8         | 0.0064   | -0.78     |
| 20180204        | 27.417    | 27.667  | 169.0 | 7.8   | 0.261   | 0.0719 | 59.9      | 0.0061  | 189.4        | nan          | 0.0458   | -11.57    |
| 20180204        | 27.683    | 27.867  | 106.6 | 7.0   | 0.146   | 0.0752 | 55.7      | 0.0052  | 244.9        | nan          | 0.0294   | -3.25     |
| 20180207        | 24.833    | 25.033  | 79.0  | 6.9   | 0.107   | 0.0007 | 43.9      | 0.0000  | nan          | nan          | 0.0266   | -1.61     |
| 20180217        | 27.417    | 27.7    | 157.9 | 7.6   | 0.245   | 0.1240 | 58.2      | 0.0125  | nan          | nan          | 0.0031   | -0.19     |
| 20180217        | 27.733    | 27.983  | 136.5 | 7.9   | 0.251   | 0.1334 | 54.4      | 0.0109  | 143.2        | nan          | 0.0234   | -2.71     |
| 20180217        | 28        | 28.075  | 109.9 | 8.5   | 0.263   | 0.1419 | 71.4      | 0.0252  | 122.4        | nan          | 0.0439   | -5.15     |
| 20180217        | 28.075    | 28.167  | 201.1 | 8.3   | 0.418   | 0.1643 | 59.4      | 0.0165  | nan          | 198.5        | 0.0999   | -17.65    |
| 20180217        | 28.333    | 28.833  | 161.8 | 7.5   | 0.237   | 0.0592 | 56.0      | 0.0052  | 195.8        | 302.1        | 0.0072   | -0.62     |
| 20180217        | 29.117    | 29.2    | 144.9 | 6.8   | 0.161   | 0.0415 | 59.0      | 0.0041  | 211.5        | nan          | 0.0020   | -0.39     |
| 20180217        | 29.2      | 29.267  | 129.2 | 7.3   | 0.174   | 0.0725 | 69.8      | 0.0114  | 211.2        | nan          | 0.2970   | -40.30    |
| 20180219        | 26.833    | 26.917  | 124.5 | 8.1   | 0.253   | 0.2345 | 53.2      | 0.0174  | nan          | 72.9         | 0.0041   | -0.36     |
| 20180219        | 26.917    | 26.992  | 159.3 | 9.1   | 0.463   | 0.2569 | 58.4      | 0.0261  | 159.1        | nan          | 0.0557   | -9.55     |
| 20180219        | 26.992    | 27.083  | 169.5 | 8.7   | 0.425   | 0.1897 | 58.8      | 0.0182  | nan          | 161.0        | 0.0551   | -10.21    |
| 20180219        | 27.3      | 27.583  | 163.9 | 9.7   | 0.502   | 0.4954 | 52.2      | 0.0372  | 222.3        | nan          | 0.0136   | -1.68     |
| 20180219        | 27.75     | 27.883  | 140.7 | 8.1   | 0.339   | 0.1568 | 54.9      | 0.0121  | 161.9        | 75.0         | 0.0038   | -0.72     |
| 20180219        | 27.883    | 27.958  | 126.5 | 8.3   | 0.330   | 0.2488 | 65.9      | 0.0207  | nan          | 23.2         | 0.0507   | -7.02     |
| 20180219        | 27.958    | 28.083  | 76.2  | 9.8   | 0.315   | 0.3318 | 56.7      | 0.0203  | 141.7        | 201.7        | 0.0104   | -0.69     |
| 20180219        | 28.6      | 28.725  | 43.1  | 11.9  | 0.238   | 0.7380 | 54.0      | 0.0568  | nan          | 150.8        | 0.1010   | -4.95     |
| 20180219        | 28.725    | 28.817  | 87.5  | 8.3   | 0.233   | 0.4196 | 68.9      | 0.0320  | nan          | nan          | 0.0444   | -4.03     |
| 20180219        | 28.817    | 28.917  | 132.0 | 7.1   | 0.172   | 0.1080 | 58.0      | 0.0099  | nan          | 132.0        | 0.0127   | -1.20     |
| 20180219        | 29.083    | 29.333  | 208.9 | 7.1   | 0.256   | 0.1073 | 54.6      | 0.0092  | 221.2        | nan          | 0.0055   | -0.81     |
